# Supplementary material for: Translation of the Modified Polycystic Ovary Syndrome Questionnaire (mPCOSQ) and the Polycystic Ovary Syndrome Quality of Life Tool (PCOSQOL) in Dutch and Flemish Women with PCOS
Source: MDPI journal article supplement (doi:10.3390/jcm12123927), 2023-06-08
Supplement: s1 [file s1]

# Supplemental tables

Supplemental Table 1: mPCOSQ factor analysis

|                           | Item |                                               | 1     | 2     | 3     | 4     | 5     | 6     |
|---------------------------|------|-----------------------------------------------|-------|-------|-------|-------|-------|-------|
| <b>Weight</b>             | 3    | Concerned about being overweight?             | 0.904 |       |       |       |       |       |
|                           | 10   | Trouble dealing with weight?                  | 0.913 |       |       |       |       |       |
|                           | 12   | Frustration in trying to lose weight?         | 0.911 |       |       |       |       |       |
|                           | 22   | Felt unsexy because of overweight?            | 0.879 |       |       |       |       |       |
|                           | 24   | Difficulties staying at your ideal weight?    | 0.911 |       |       |       |       |       |
| <b>Body hair</b>          | 1    | Growth of visible hair on chin?               |       | 0.862 |       |       |       |       |
|                           | 9    | Growth of visible hair on upper lip?          |       | 0.812 |       |       |       |       |
|                           | 15   | Growth of visible hair on your face?          |       | 0.917 |       |       |       |       |
|                           | 16   | Embarrassment about excessive body hair?      |       | 0.852 |       |       |       |       |
|                           | 26   | Growth of visible body hair?                  |       | 0.892 |       |       |       |       |
| <b>Emotions</b>           | 2    | Depressed as a result of having PCOS?         |       |       | 0.687 |       |       |       |
|                           | 4    | Tired easily?                                 |       |       | 0.537 |       |       |       |
|                           | 6    | Moody as a result of having PCOS?             |       |       | 0.701 |       |       |       |
|                           | 11   | Low self-esteem as a result of having PCOS?   |       |       | 0.648 |       |       |       |
|                           | 14   | Afraid of getting cancer?                     |       |       | 0.597 |       |       |       |
|                           | 17   | Worried about having PCOS?                    |       |       | 0.656 |       |       |       |
|                           | 18   | Self-conscious as a result of having PCOS?    |       |       | 0.686 |       |       |       |
|                           | 23   | Lack of control over the situation with PCOS? |       |       | 0.592 |       |       |       |
| <b>Acne</b>               | 27   | Acne (last two weeks)?                        |       |       |       | 0.924 |       |       |
|                           | 28   | Felt unattractive because of acne?            |       |       |       | 0.948 |       |       |
|                           | 29   | Depressed as a result of acne?                |       |       |       | 0.834 |       |       |
|                           | 30   | Acne (in relation to last menstruation)?      |       |       |       | 0.888 |       |       |
| <b>Infertility</b>        | 5    | Concerned about infertility problems?         |       |       |       |       | 0.899 |       |
|                           | 13   | Afraid of not being able to have children?    |       |       |       |       | 0.834 |       |
|                           | 25   | Sad because of infertility problems?          |       |       |       |       | 0.870 |       |
| <b>Menstrual problems</b> | 7    | Headaches?                                    |       |       |       |       |       | 0.608 |
|                           | 8    | Irregular menstrual periods?                  |       |       |       |       |       | 0.719 |
|                           | 19   | Abdominal bloating?                           |       |       |       |       |       | 0.651 |
|                           | 20   | Late menstrual period?                        |       |       |       |       |       | 0.694 |

|  |    |                   |       |
|--|----|-------------------|-------|
|  | 21 | Menstrual cramps? | 0.600 |
|--|----|-------------------|-------|

**Supplemental Table 2: PCOSQOL factor analysis**

| Factor                  | Item |                                                                           | 1     | 2     | 3      | 4     | 5 |
|-------------------------|------|---------------------------------------------------------------------------|-------|-------|--------|-------|---|
| <b>Impact of PCOS</b>   | 4    | Felt like you weren't a real woman because of your PCOS                   | 0.545 |       |        |       |   |
|                         | 5    | Felt overwhelmed by your PCOS and depression                              | 0.801 |       |        |       |   |
|                         | 6    | Felt depressed about how PCOS has impacted your life                      | 0.767 |       |        |       |   |
|                         | 10   | Felt like less of a woman because of having PCOS                          | 0.590 |       |        |       |   |
|                         | 13   | Wanted to do something but haven't because of your PCOS                   | 0.673 |       |        |       |   |
|                         | 14   | Felt depressed                                                            | 0.739 |       |        |       |   |
|                         | 15   | Felt abnormal because of your PCOS                                        | 0.678 |       |        |       |   |
|                         | 16   | Felt like you don't know what to do to help yourself                      | 0.610 |       |        |       |   |
|                         | 17   | Felt like you don't know what to do to control your PCOS                  | 0.543 |       |        |       |   |
|                         | 18   | Felt like you hated yourself                                              | 0.597 |       |        |       |   |
|                         | 35   | Wanted to take part in a social activity but haven't because of your PCOS | 0.649 |       |        |       |   |
| <b>Infertility</b>      | 1    | Felt under pressure to have a child                                       |       | 0.661 |        |       |   |
|                         | 8    | Felt anxious about conceiving a child                                     |       | 0.905 |        |       |   |
|                         | 9    | Felt depressed over difficulties conceiving a child                       |       | 0.880 |        |       |   |
|                         | 23   | Felt depressed because of your infertility                                |       | 0.860 |        |       |   |
|                         | 25   | Felt depressed over your struggle to have children                        |       | 0.878 |        |       |   |
|                         | 31   | Felt like a failure because of your trouble conceiving                    |       | 0.827 |        |       |   |
|                         | 34   | Been scared that you may not have children                                |       | 0.852 |        |       |   |
| <b>Hirsutism</b>        | 7    | Been worried about other people seeing your facial hair                   |       |       | 0.880  |       |   |
|                         | 20   | Felt embarrassed about the way you look                                   |       |       | <0.500 |       |   |
|                         | 21   | Felt moody because of your excess hair                                    |       |       | 0.861  |       |   |
|                         | 22   | Felt depressed because of your hirsutism                                  |       |       | 0.796  |       |   |
|                         | 24   | Spent a lot of time and energy removing excess hair                       |       |       | 0.854  |       |   |
|                         | 26   | Felt depressed because of your facial hair                                |       |       | 0.830  |       |   |
|                         | 30   | Felt embarrassed by your facial hair                                      |       |       | 0.900  |       |   |
| <b>Coping with PCOS</b> | 19   | Felt like your PCOS is in control of your life                            | 0.503 |       |        | 0.558 |   |
|                         | 27   | Felt angry that you have PCOS                                             |       |       |        | 0.673 |   |
|                         | 28   | Been envious of women without PCOS                                        |       |       |        | 0.797 |   |

|             |    |                                                                           |       |
|-------------|----|---------------------------------------------------------------------------|-------|
|             | 29 | Felt embarrassed about having PCOS                                        | 0.561 |
|             | 32 | Felt that it is unfair that you have PCOS                                 | 0.724 |
|             | 33 | Struggled to cope with your PCOS and your other condition(s)              | 0.639 |
| <b>Mood</b> | 2  | Felt guilty for being overly aggressive towards a friend or family member | 0.793 |
|             | 3  | Over reacted to a day-to-day occurrence because of your PCOS              | 0.632 |
|             | 11 | Had a short temper with your close friends and/or family                  | 0.803 |
|             | 12 | Felt like crying for no reason                                            | 0.647 |
