# Supplementary material for: Translation of the Modified Polycystic Ovary Syndrome Questionnaire (mPCOSQ) and the Polycystic Ovary Syndrome Quality of Life Tool (PCOSQOL) in Dutch and Flemish Women with PCOS
Source: MDPI journal article supplement (doi:10.3390/jcm12123927), 2023-06-08
Supplement: s1 [file s1]

**mPCOSQ Nederlands**

Instructies: Deze vragenlijst is ontwikkeld voor vrouwen met Polycysteus Ovarium Syndroom. In de vragenlijst zullen we verwijzen naar het Polycysteus Ovarium Syndroom met de afkorting PCOS. De vragen gaan over uw gezondheid en problemen die te maken hebben met uw gezondheid.

Beantwoord elke vraag door het vakje aan te kruisen met het antwoord dat het beste uw gevoel weergeeft. Voor elke vraag heeft u zeven antwoordmogelijkheden. Optie 1 vertegenwoordigt de grootst mogelijke last weer, terwijl optie 7 de minste last weergeeft. Kies slechts één antwoord voor elke vraag. Er zijn geen goede of foute antwoorden, kies het antwoord dat uw gevoel het beste weergeeft.

In welke mate heeft u het gevoel gehad dat zichtbare haargroei op uw kin een probleem voor u is geweest in de afgelopen twee weken:

[illegible]

**Hoe vaak heeft u zich in de afgelopen twee weken ... gevoeld:**

[illegible]

In welke mate waren tijdens uw laatste menstruatie, de volgende zaken een probleem voor u:

[illegible]

**In welke mate was zichtbare haargroei op uw bovenlip in de afgelopen twee weken een probleem voor u:**

[illegible]

**Hoe vaak heeft u in de afgelopen twee weken:**

[illegible]

In welke mate zijn de volgende zaken een probleem voor u geweest in de afgelopen twee weken:

[illegible]

**Hoe vaak heeft u zich in de afgelopen twee weken ... gevoeld:**

[illegible]

**In welke mate waren tijdens uw laatste menstruatie, de volgende zaken voor u een probleem:**

[illegible]

**Hoe vaak heeft/bent u in de afgelopen twee weken:**

[illegible]

**In welke mate was zichtbaar lichaamshaar in de afgelopen twee weken een probleem voor u:**

[illegible]

**In welke mate zijn de volgende zaken een probleem voor u geweest in de afgelopen twee weken:**

|                      | Een ernstig probleem     | Een groot probleem       | Een gemiddeld probleem   | Enigszins een probleem   | Een klein probleem       | Nauwelijks een probleem  | Geen probleem            |
|----------------------|--------------------------|--------------------------|--------------------------|--------------------------|--------------------------|--------------------------|--------------------------|
| 27: Acne (puistjes)? | <input type="checkbox"/> |

**Hoe vaak heeft u zich in de afgelopen twee weken ... gevoeld:**

|                                                          | De hele tijd             | Het merendeel van de tijd | Redelijk deel van de tijd | Een deel van de tijd     | Een klein deel van de tijd | Nauwelijks               | Niet                     |
|----------------------------------------------------------|--------------------------|---------------------------|---------------------------|--------------------------|----------------------------|--------------------------|--------------------------|
| 28: Onaantrekkelijk door het hebben van acne (puistjes)? | <input type="checkbox"/> | <input type="checkbox"/>  | <input type="checkbox"/>  | <input type="checkbox"/> | <input type="checkbox"/>   | <input type="checkbox"/> | <input type="checkbox"/> |
| 29. Depressief door het hebben van acne (puistjes)?      | <input type="checkbox"/> | <input type="checkbox"/>  | <input type="checkbox"/>  | <input type="checkbox"/> | <input type="checkbox"/>   | <input type="checkbox"/> | <input type="checkbox"/> |

**In welke mate was tijdens uw laatste menstruatie, ..... voor u een probleem:**

|                      | Een ernstig probleem     | Een groot probleem       | Een gemiddeld probleem   | Enigszins een probleem   | Een klein probleem       | Nauwelijks een probleem  | Geen probleem            |
|----------------------|--------------------------|--------------------------|--------------------------|--------------------------|--------------------------|--------------------------|--------------------------|
| 30. Acne (puistjes)? | <input type="checkbox"/> |

**Scoring (scoor elk antwoord van 1 tot 7):**

Gewicht:  $3 + 10 + 12 + 22 + 24 / 5$

Lichaamsbeharng:  $1 + 9 + 15 + 16 + 26 / 5$

Emoties:  $2 + 4 + 6 + 11 + 14 + 17 + 18 + 23 / 8$

Acne:  $27 + 28 + 29 + 30 / 4$

Vruchtbaarheid:  $5 + 13 + 25 / 3$

Menstruatie problemen:  $7 + 8 + 19 + 20 + 21 / 5$

Een hogere score betekent een betere kwaliteit van leven.
